# Supplementary material for: Role of Substance P in Regulating Micro-Milieu of Inflammation in Alopecia Areata
Source: PubMed Central journal article supplement — Ann Dermatol. 2022 Jul 22;34(4):270–7. doi: 10.5021/ad.21.161 (PMC9365655; doi:10.5021/ad.21.161), 2022-07-22
Supplement: ad-34-270-s001.pdf [file ad-34-270-s001.pdf]

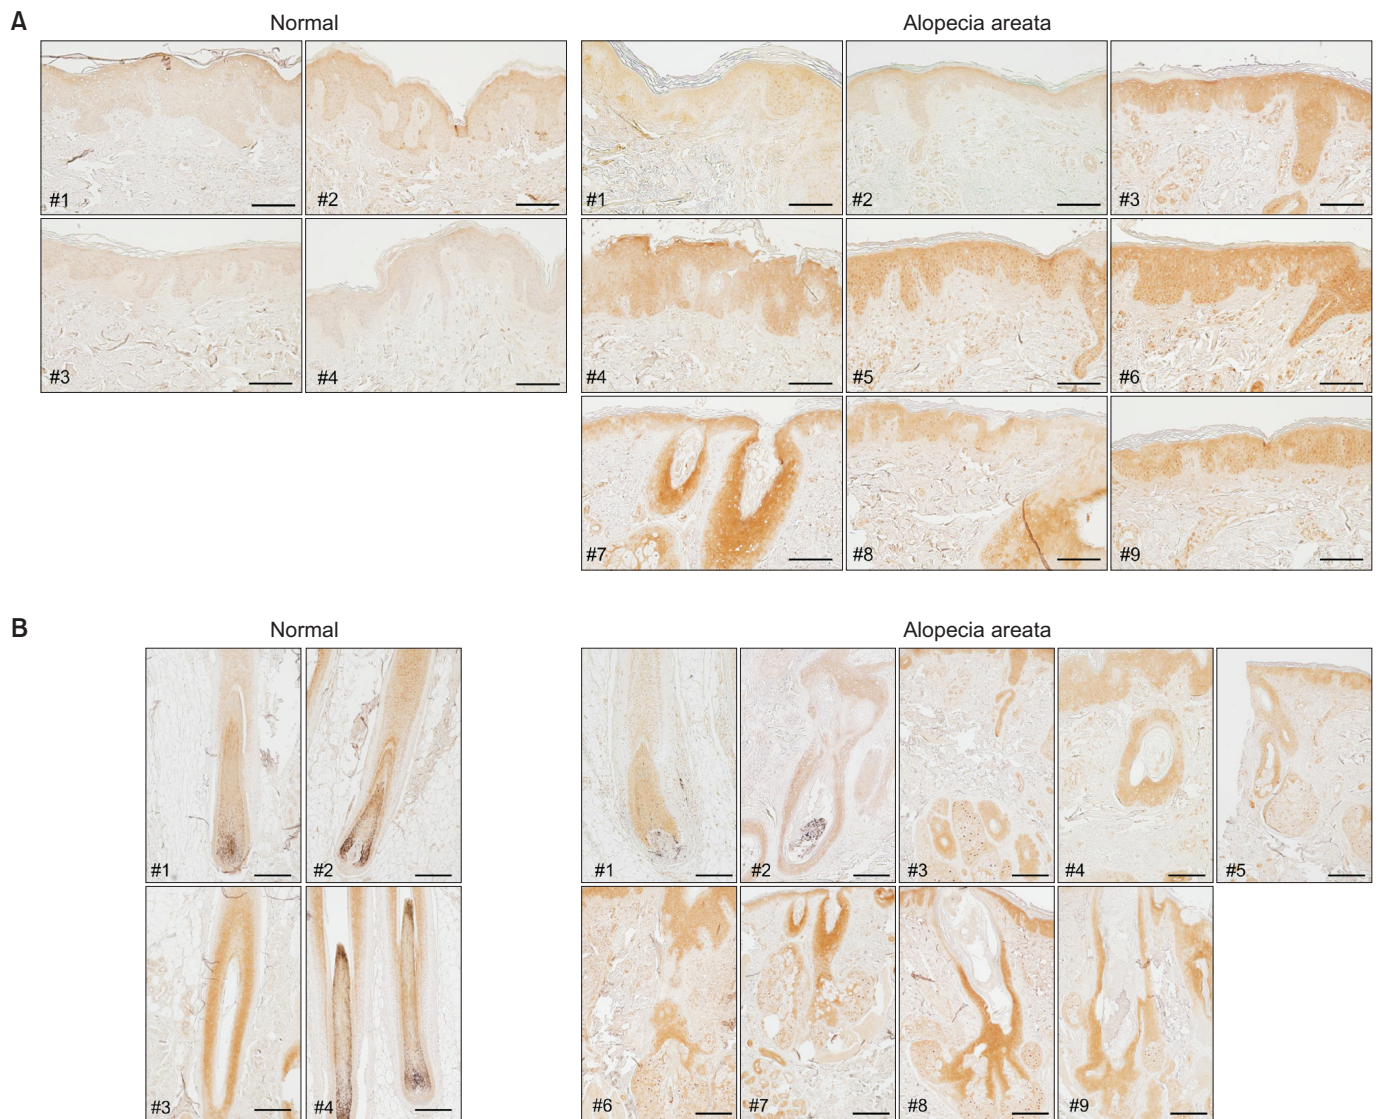

**Supplementary Fig. 1.** Expression of substance P in epidermis (A) and hair follicles (B) of healthy subjects and alopecia areata patients. Paraffin-embedded normal scalp skin and AA lesions are immunohistochemically stained with anti-substance P (n=9; scale bar: A, 200  $\mu$ m; B, 100  $\mu$ m).
